# Supplementary material
Source: PubMed Central journal article supplement (PMC7610419)

Extended Data Fig. 2a

shControl  
shPLCy1 #1  
shPLCy1 #2

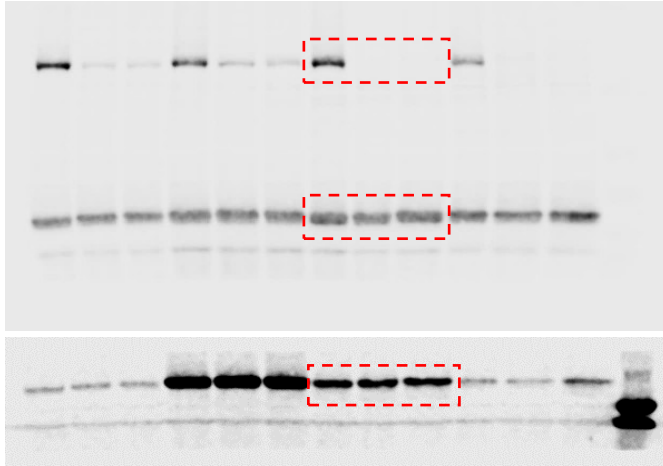

H358

Mouse anti-PLCy1  
+anti-mouse Green IRDye 680 RD

130

95

Mouse anti-AKT

72

+anti-mouse Green IRDye 680 RD

55

Rabbit anti-pAKT

+anti-rabbit Red IRDye 800 CW

55

A427

Mouse anti-PLCy1  
+anti-mouse Green IRDye 680 RD

130

95

72

55

Mouse anti-AKT

+anti-mouse Green IRDye 680 RD

Rabbit anti-pAKT

+anti-rabbit Red IRDye 800 CW

55

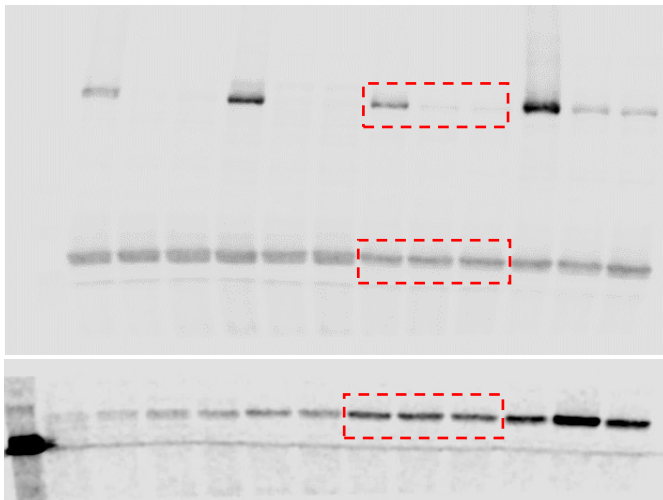

Extended Data Fig. 2d

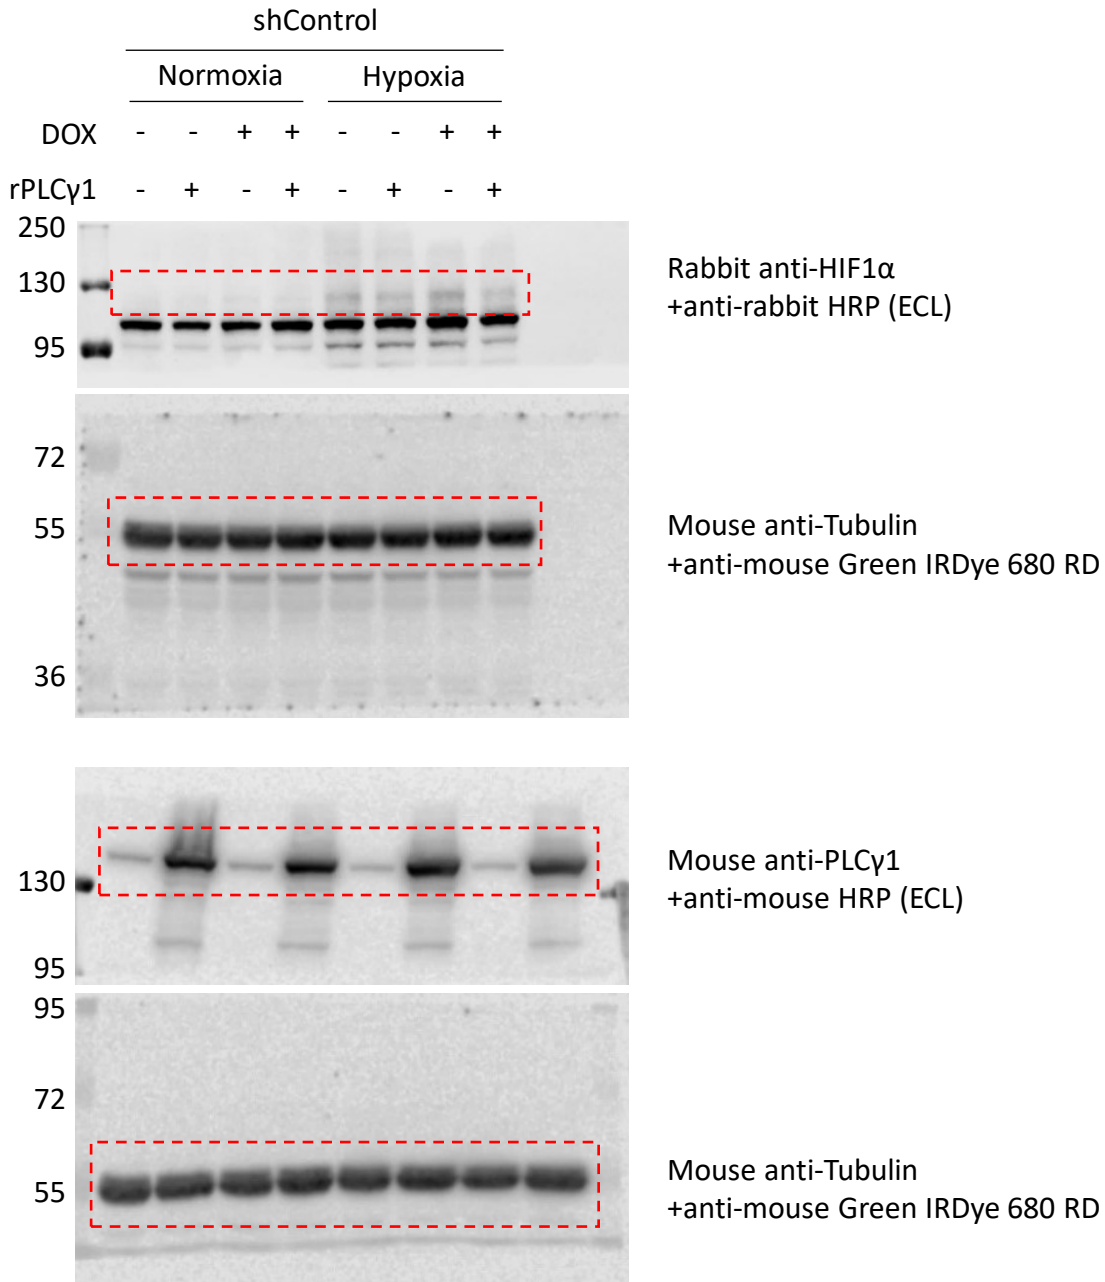

Extended Data Fig. 2d

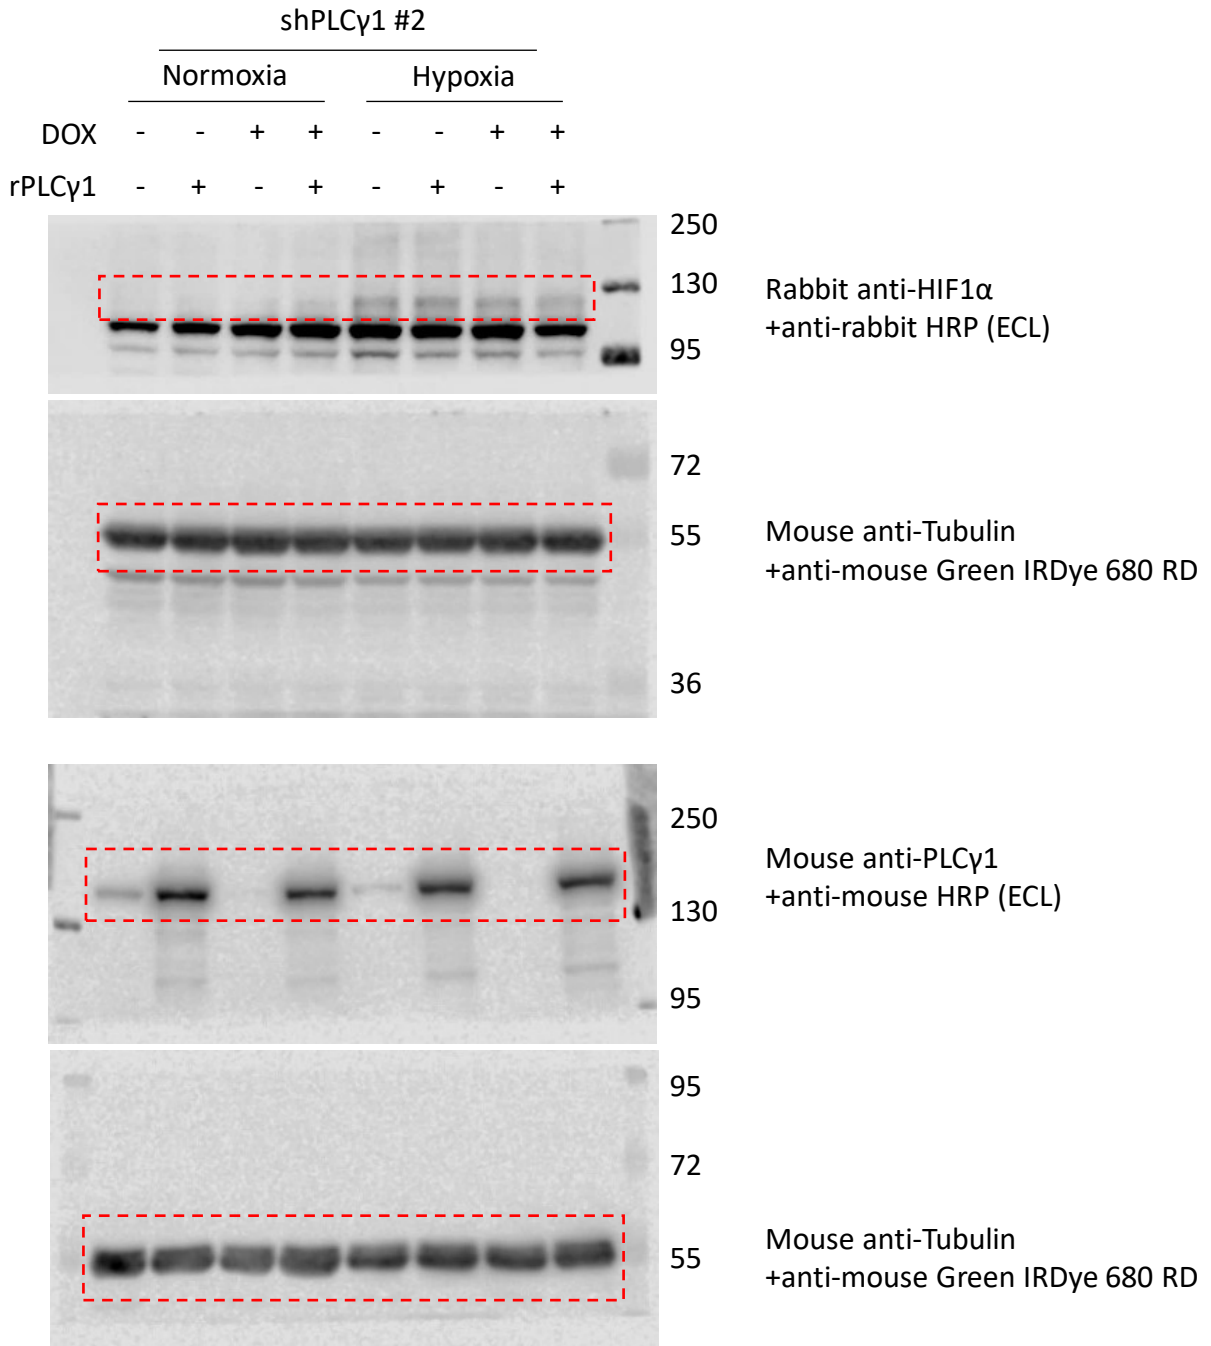

Extended Data Fig. 2e

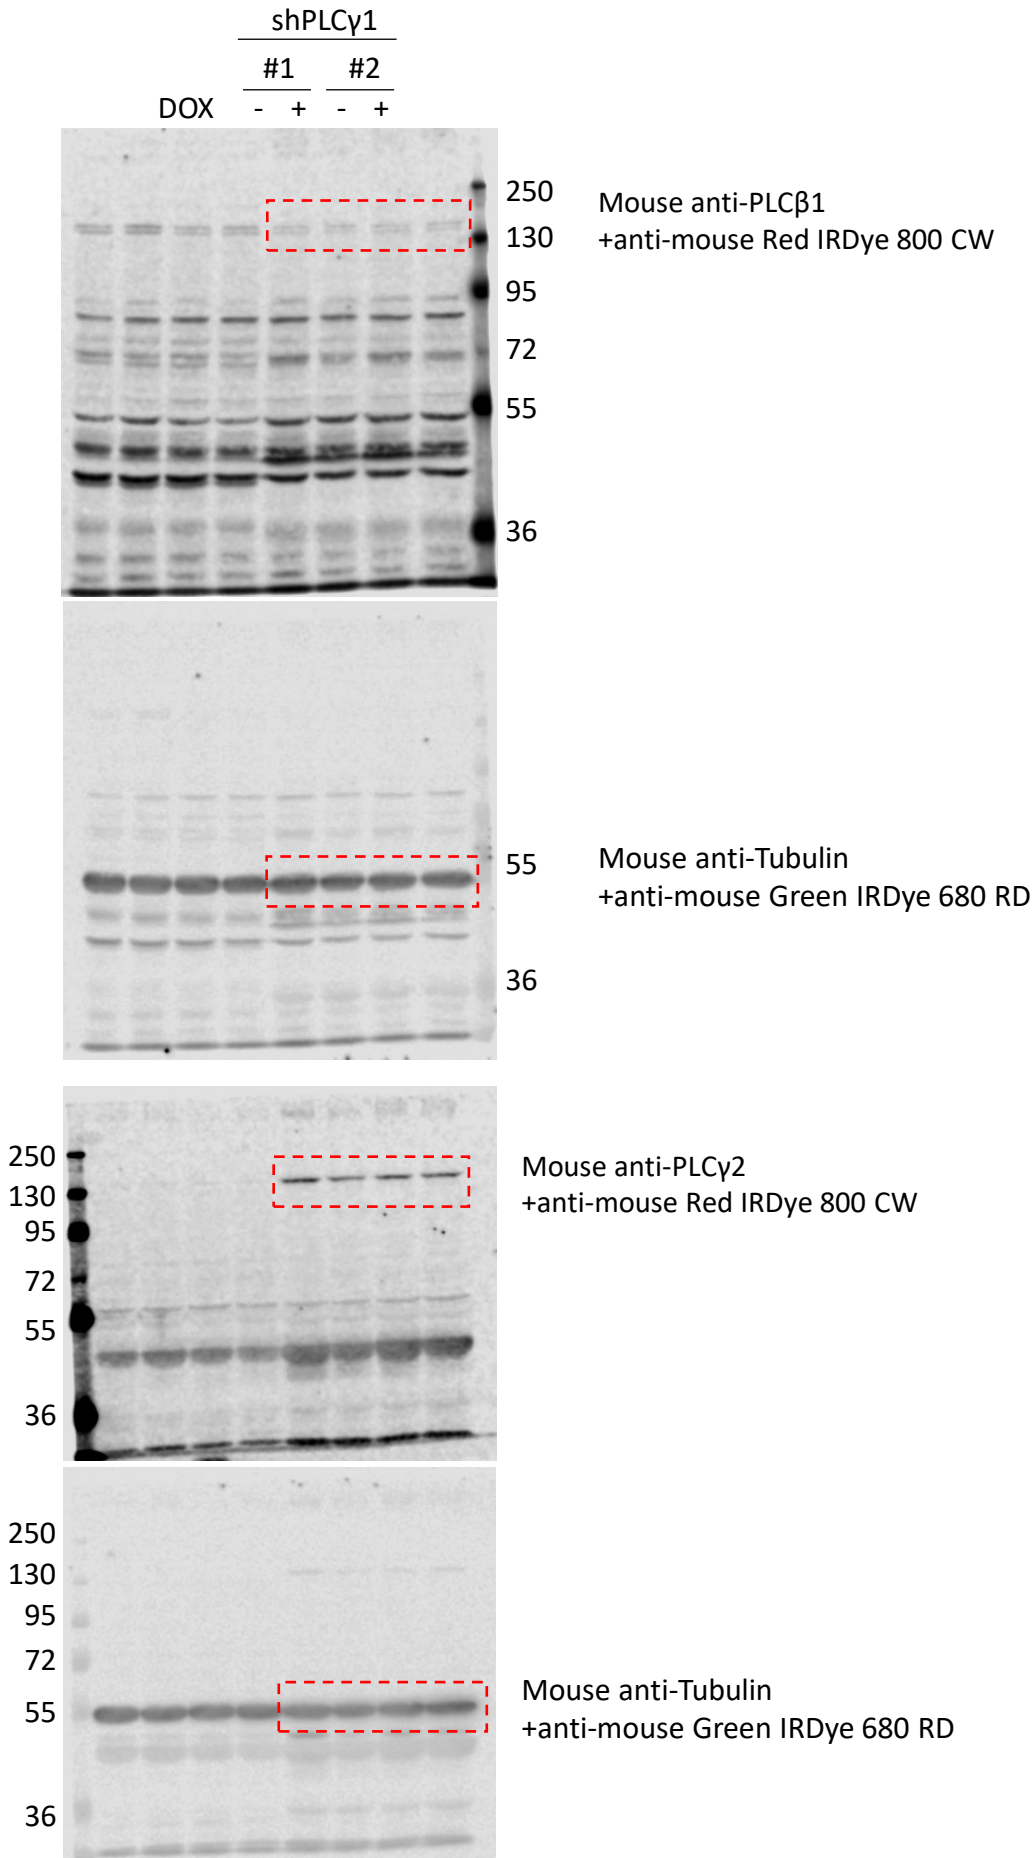

Extended Data Fig. 2e

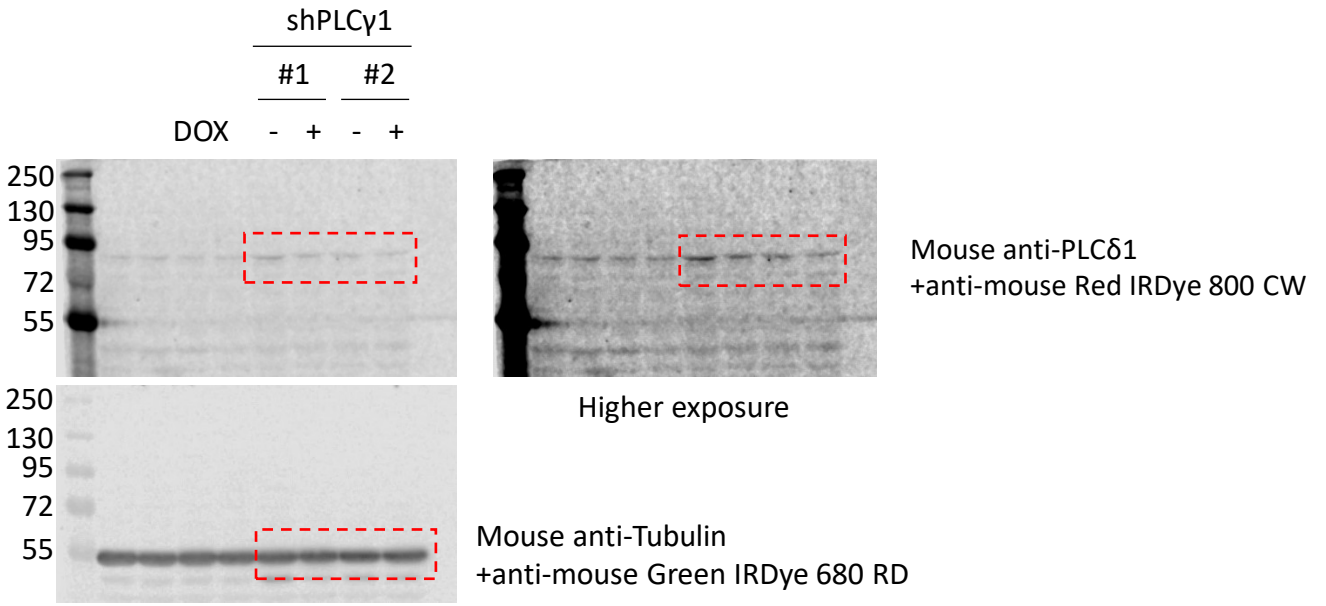

Extended Data Fig. 2f

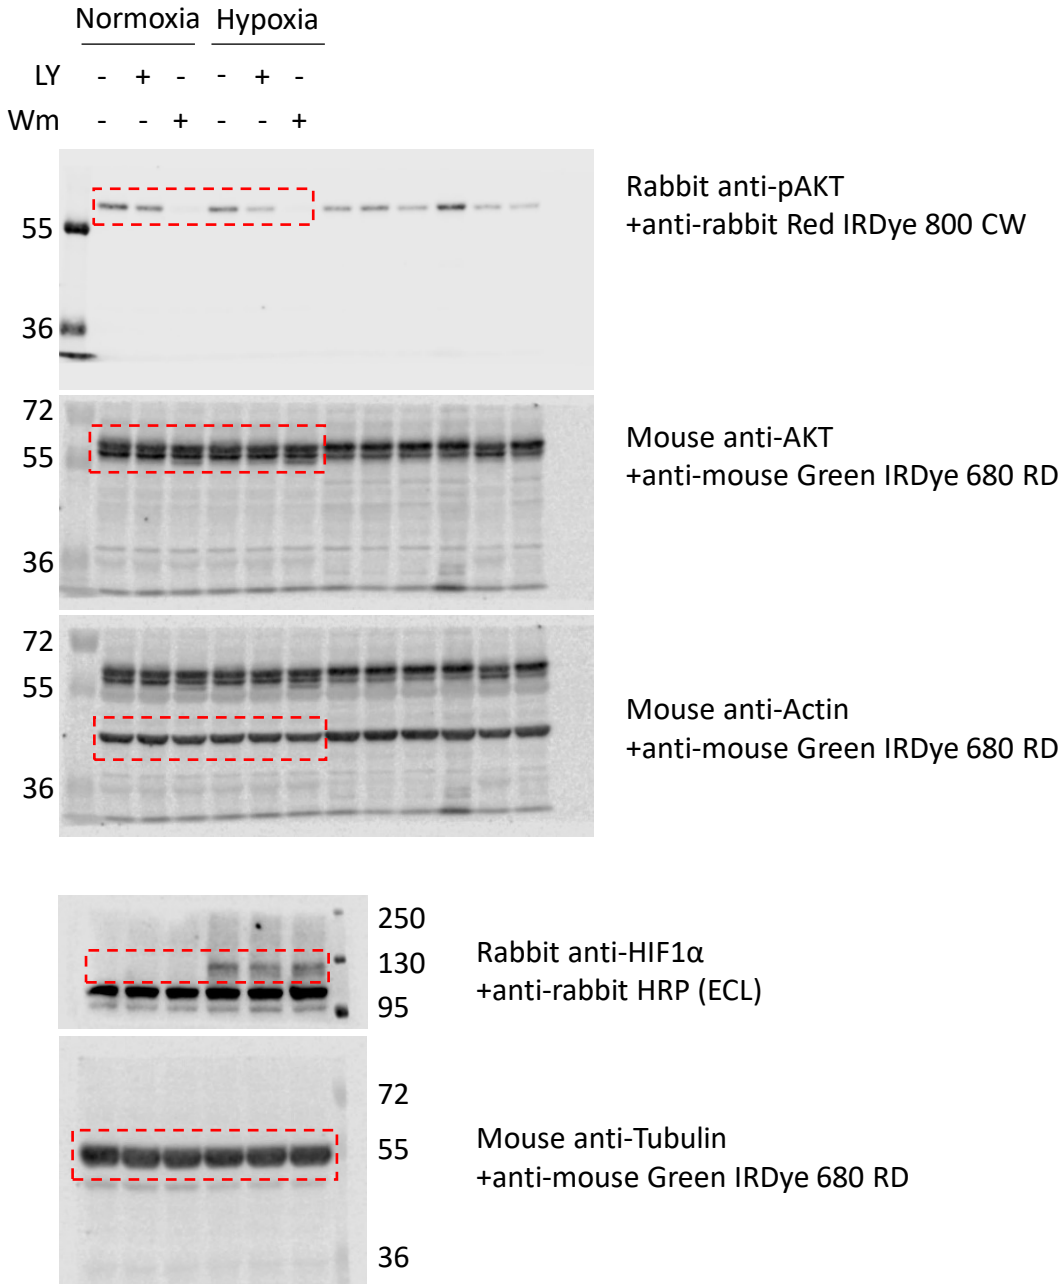

Supplement: EMS117941-supplement-Saliakoura__Unprocessed_Gels_ED_Fig2.pdf [file EMS117941-supplement-Saliakoura__Unprocessed_Gels_ED_Fig2.pdf]
