# Supplementary material
Source: PubMed Central journal article supplement (PMC7610419)
Supplement: EMS117941-supplement-Supplementary_Figure_1.pdf [file EMS117941-supplement-Supplementary_Figure_1.pdf]

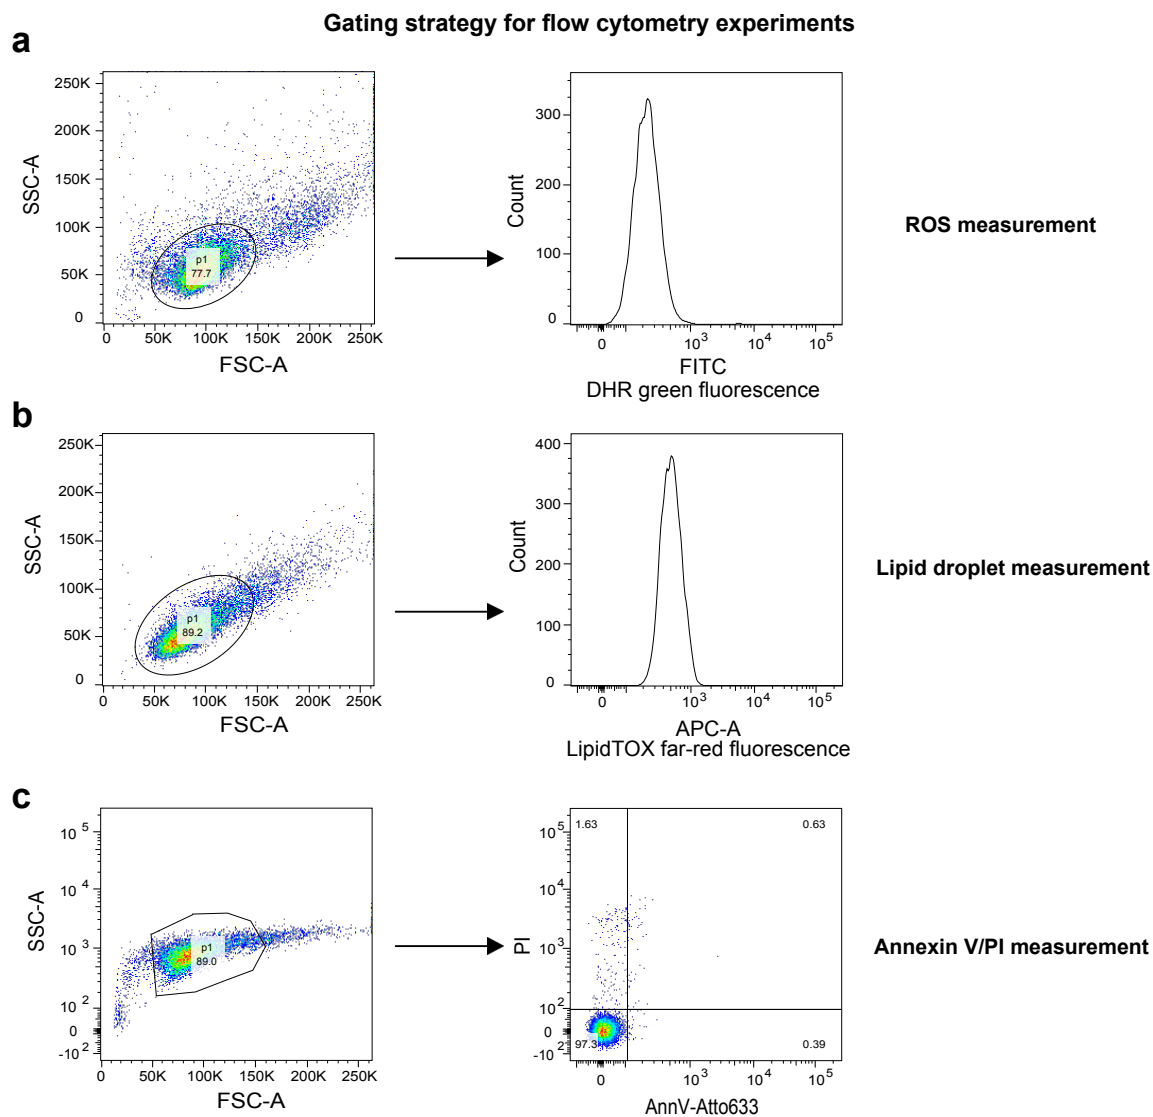

**Supplementary Fig. 1. Gating strategy for ROS (DHR), lipid droplets (LipidTOX) and apoptosis (ANN/PI) measurement.**

**(a)** Gating strategy for DHR green fluorescence measurement. Related to panels: 4a,-4c, 4e-4i and ED Fig. 6a, 6e.

**(b)** Gating strategy for lipid droplets (LipidTOX) measurement. Related to panels: 3i, 3l and ED Fig. 5d.

**(c)** Gating strategy for apoptosis (Annexin V-Atto 633/PI) measurement. Related to panels: 2d, 2g, 5e, 5f and ED Fig. 3a, 3c, 3d, 3f, 7f, 7g.

Cells were gated according to their forward and side scatter values in order to exclude cell clusters and debris.
