# Supplementary material
Source: PubMed Central journal article supplement (PMC7610419)

Extended Data Fig. 3e

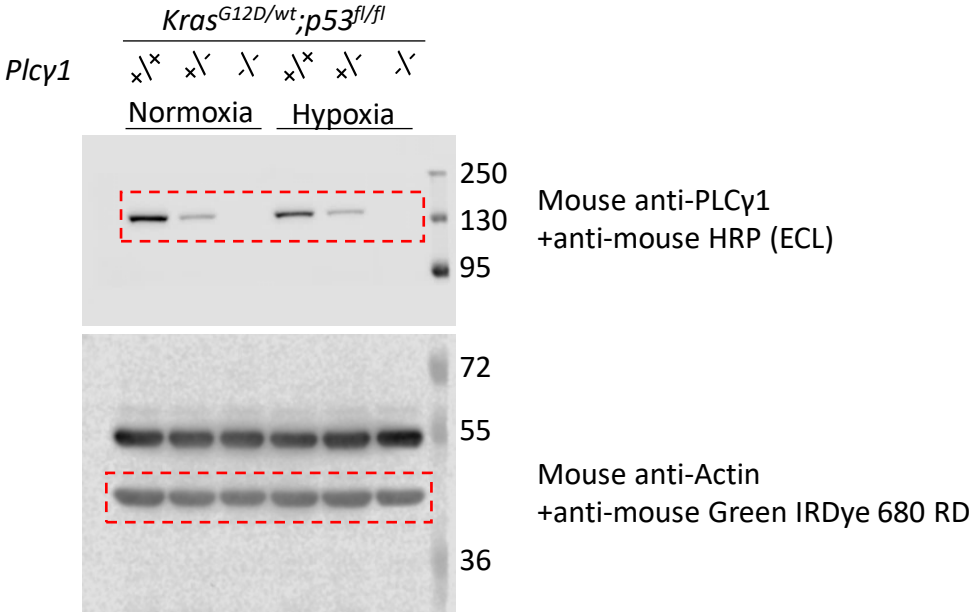

Supplement: EMS117941-supplement-Saliakoura__Unprocessed_Gels_ED_Fig3.pdf [file EMS117941-supplement-Saliakoura__Unprocessed_Gels_ED_Fig3.pdf]

Extended Data Fig. 4a

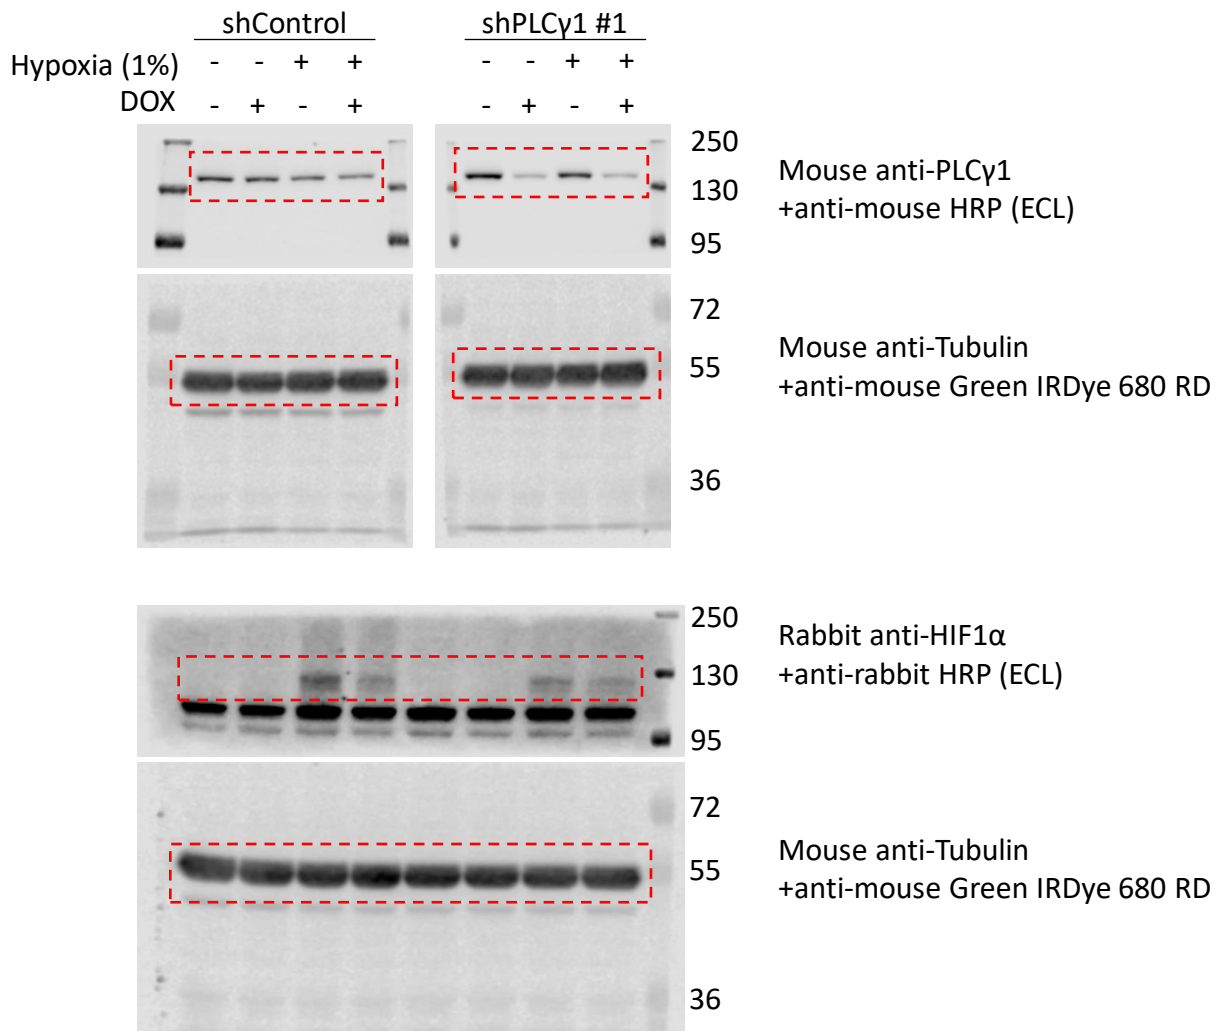

Supplement: EMS117941-supplement-Saliakoura__Unprocessed_Gels_ED_Fig4.pdf [file EMS117941-supplement-Saliakoura__Unprocessed_Gels_ED_Fig4.pdf]

Extended Data Fig. 5a

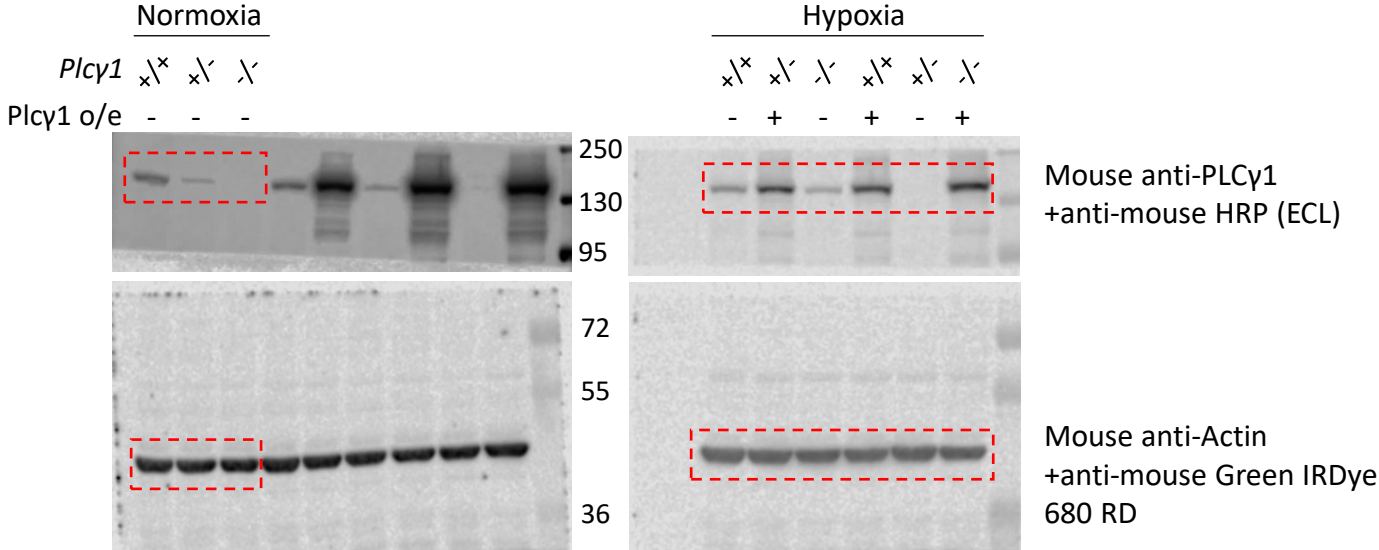

Supplement: EMS117941-supplement-Saliakoura__Unprocessed_Gels_ED_Fig5.pdf [file EMS117941-supplement-Saliakoura__Unprocessed_Gels_ED_Fig5.pdf]

Extended Data Fig. 6c

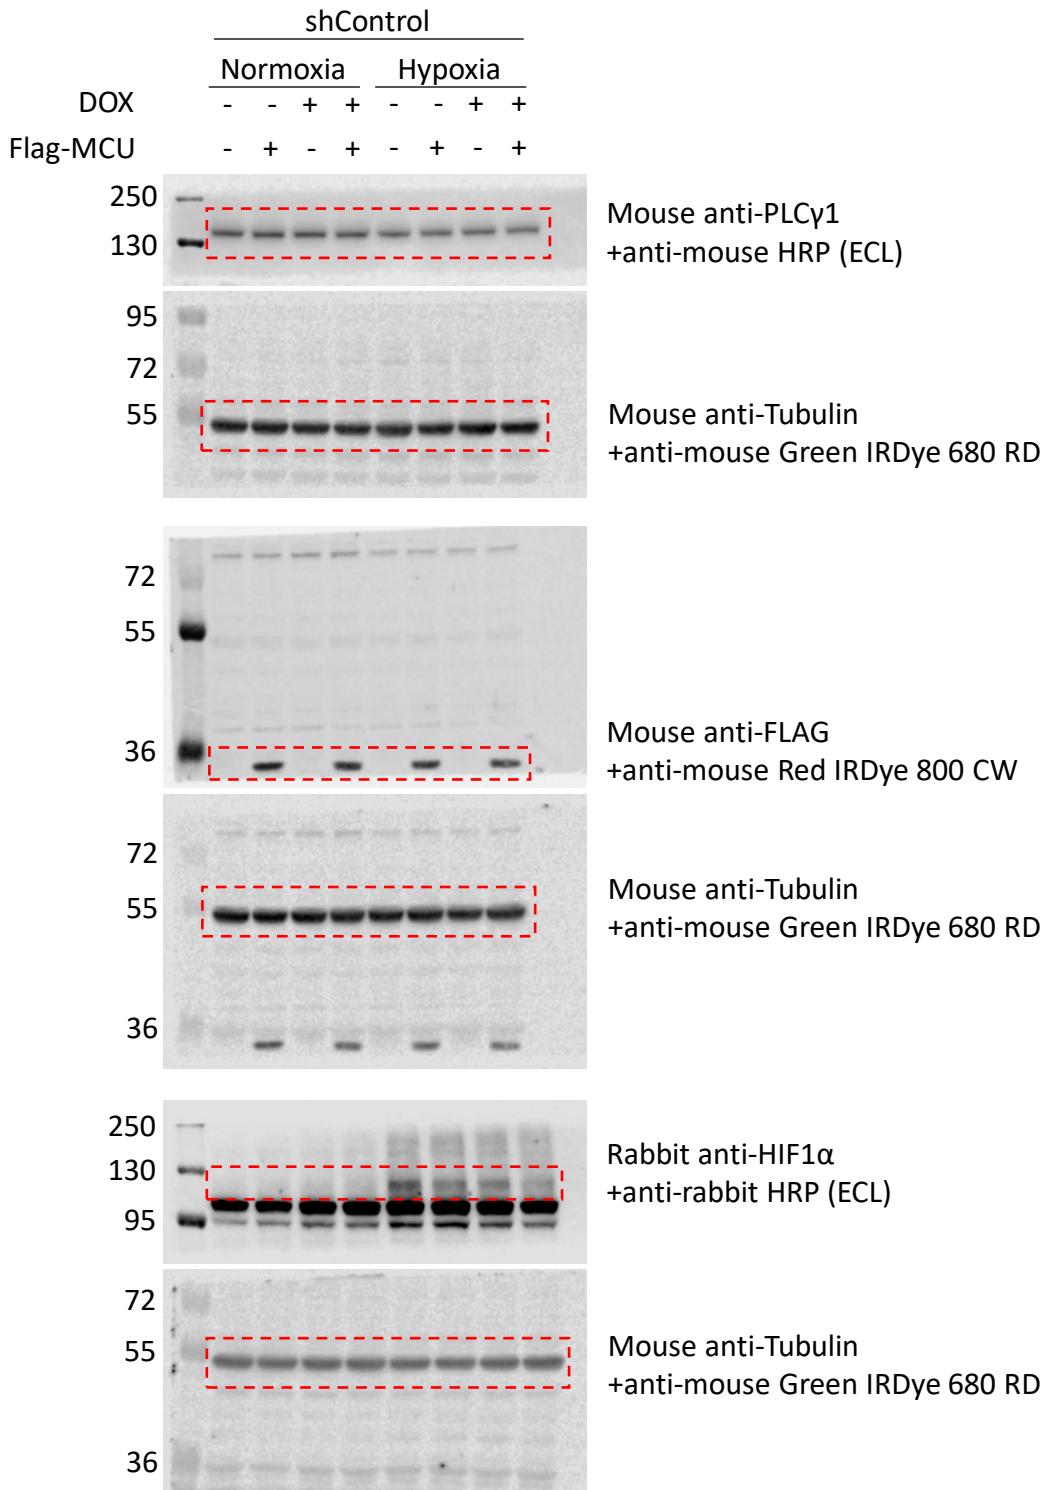

Extended Data Fig. 6c

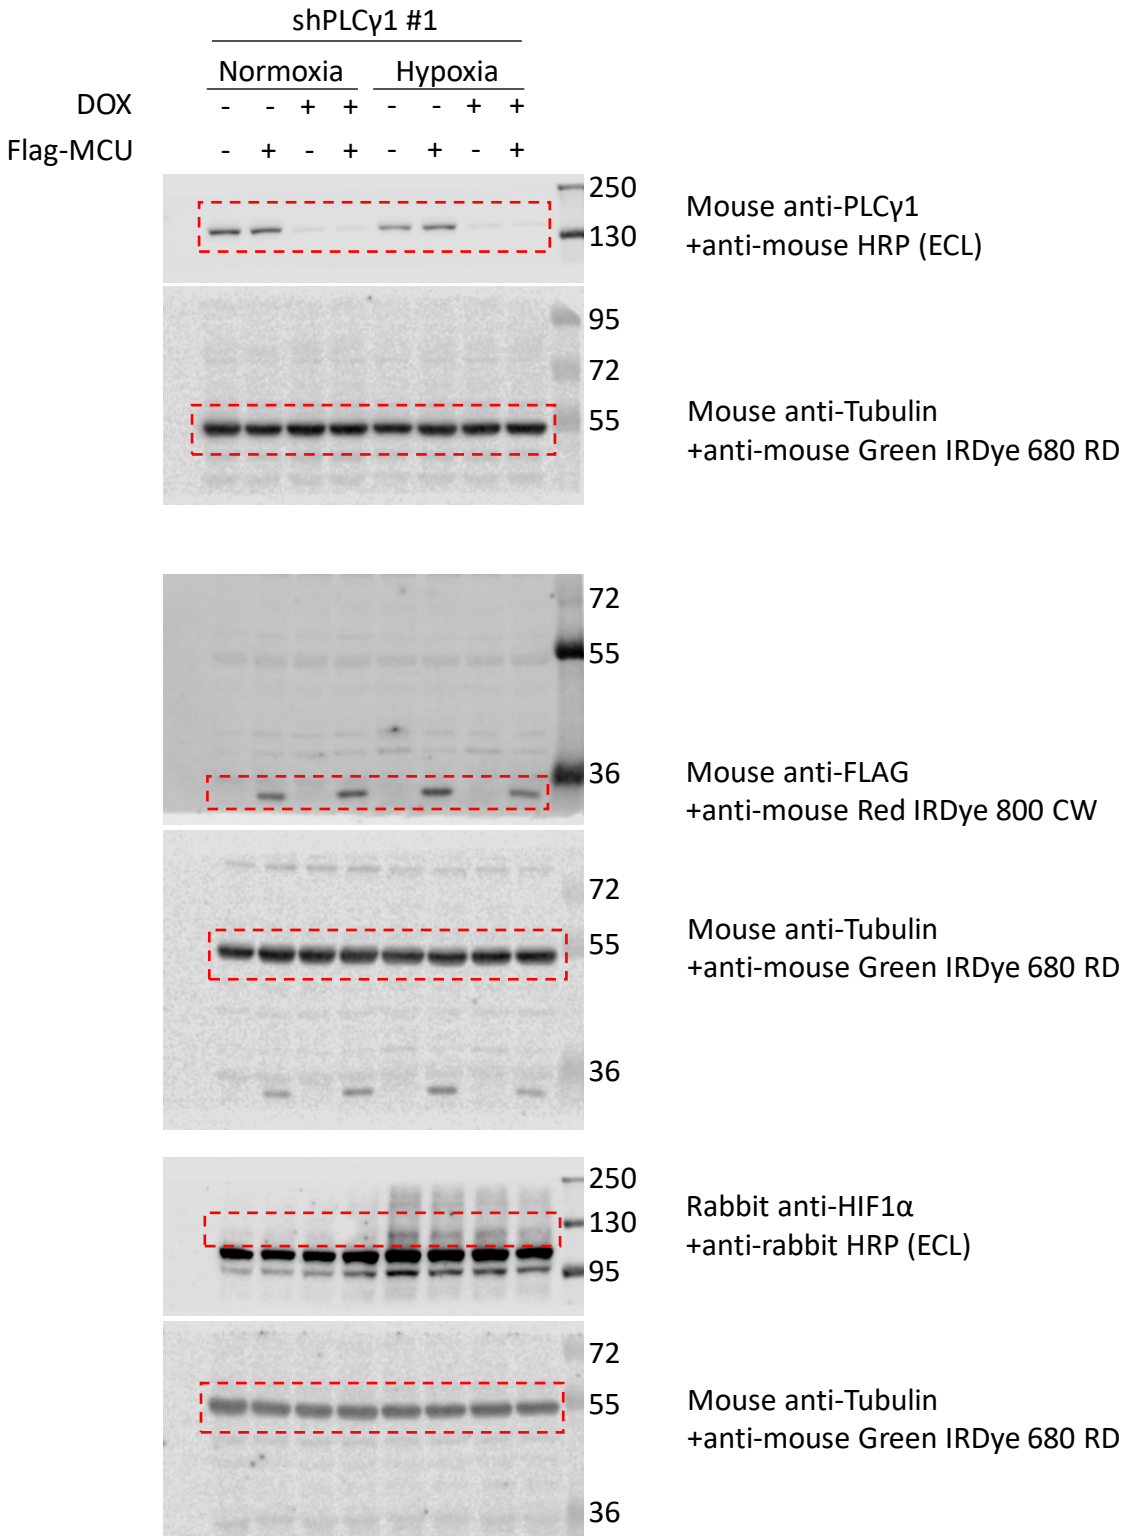

Extended Data Fig. 6c

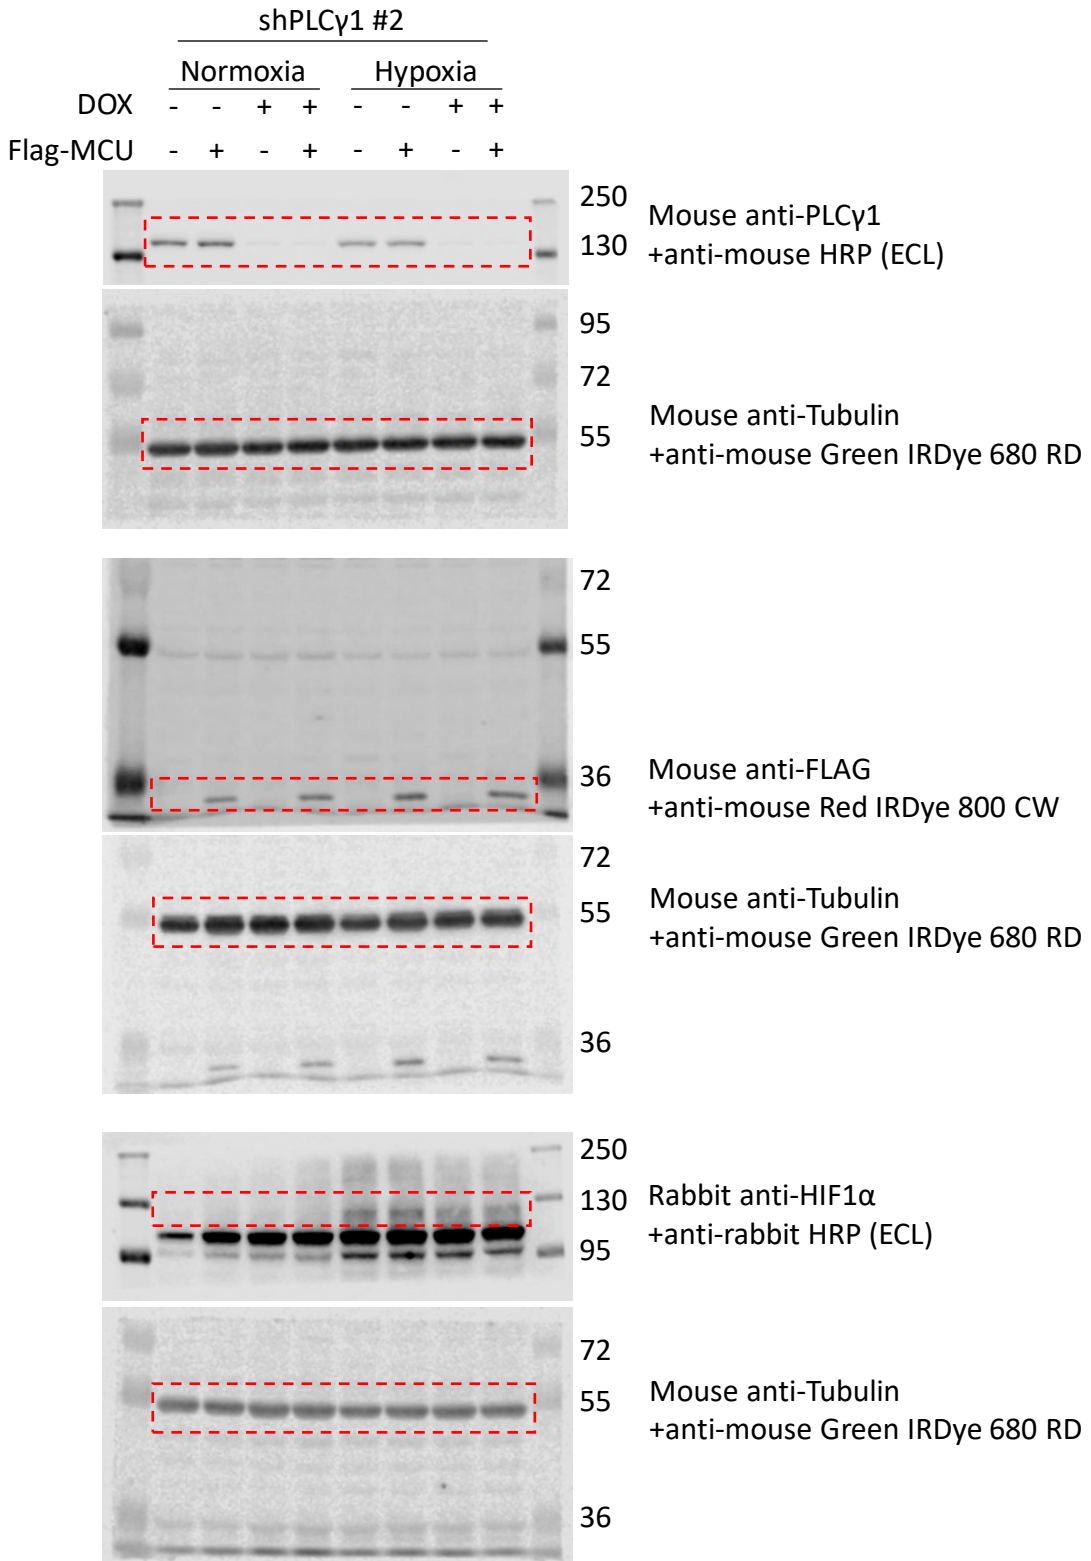

Supplement: EMS117941-supplement-Saliakoura__Unprocessed_Gels_ED_Fig6.pdf [file EMS117941-supplement-Saliakoura__Unprocessed_Gels_ED_Fig6.pdf]

Extended Data Fig. 7a

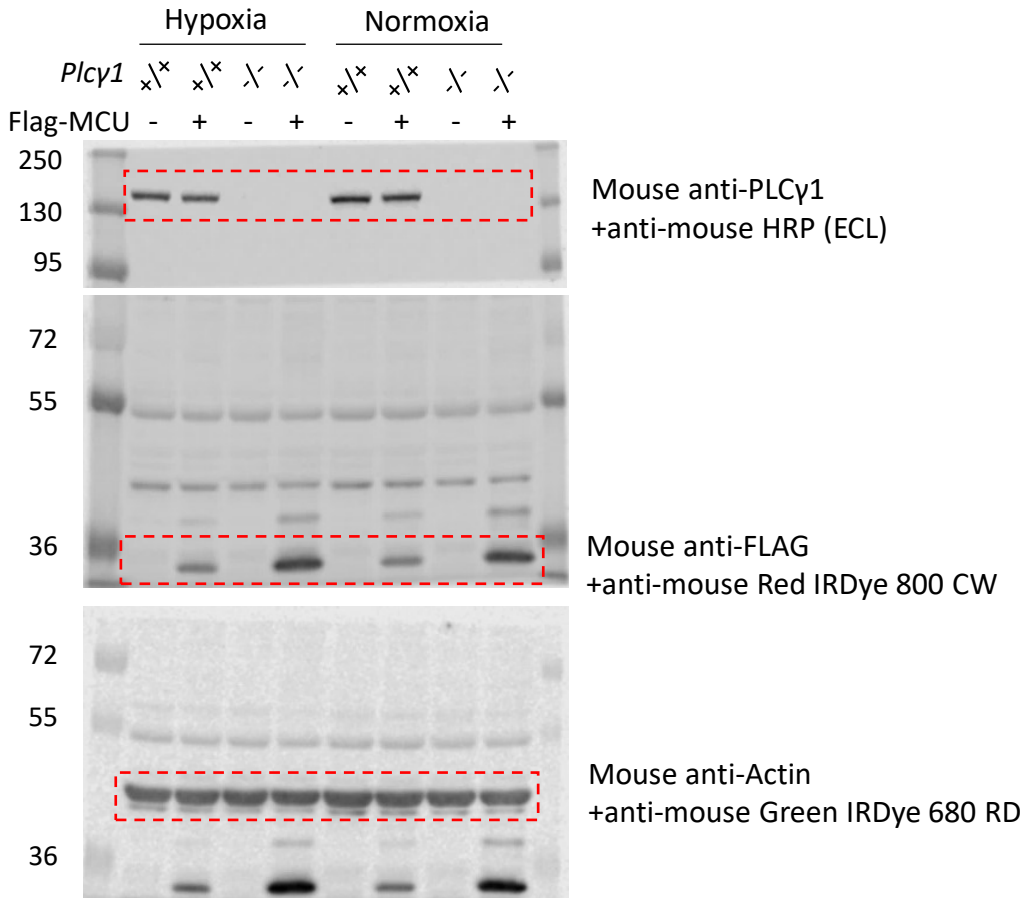

Supplement: EMS117941-supplement-Saliakoura__Unprocessed_Gels_ED_Fig7.pdf [file EMS117941-supplement-Saliakoura__Unprocessed_Gels_ED_Fig7.pdf]

Figure 1f

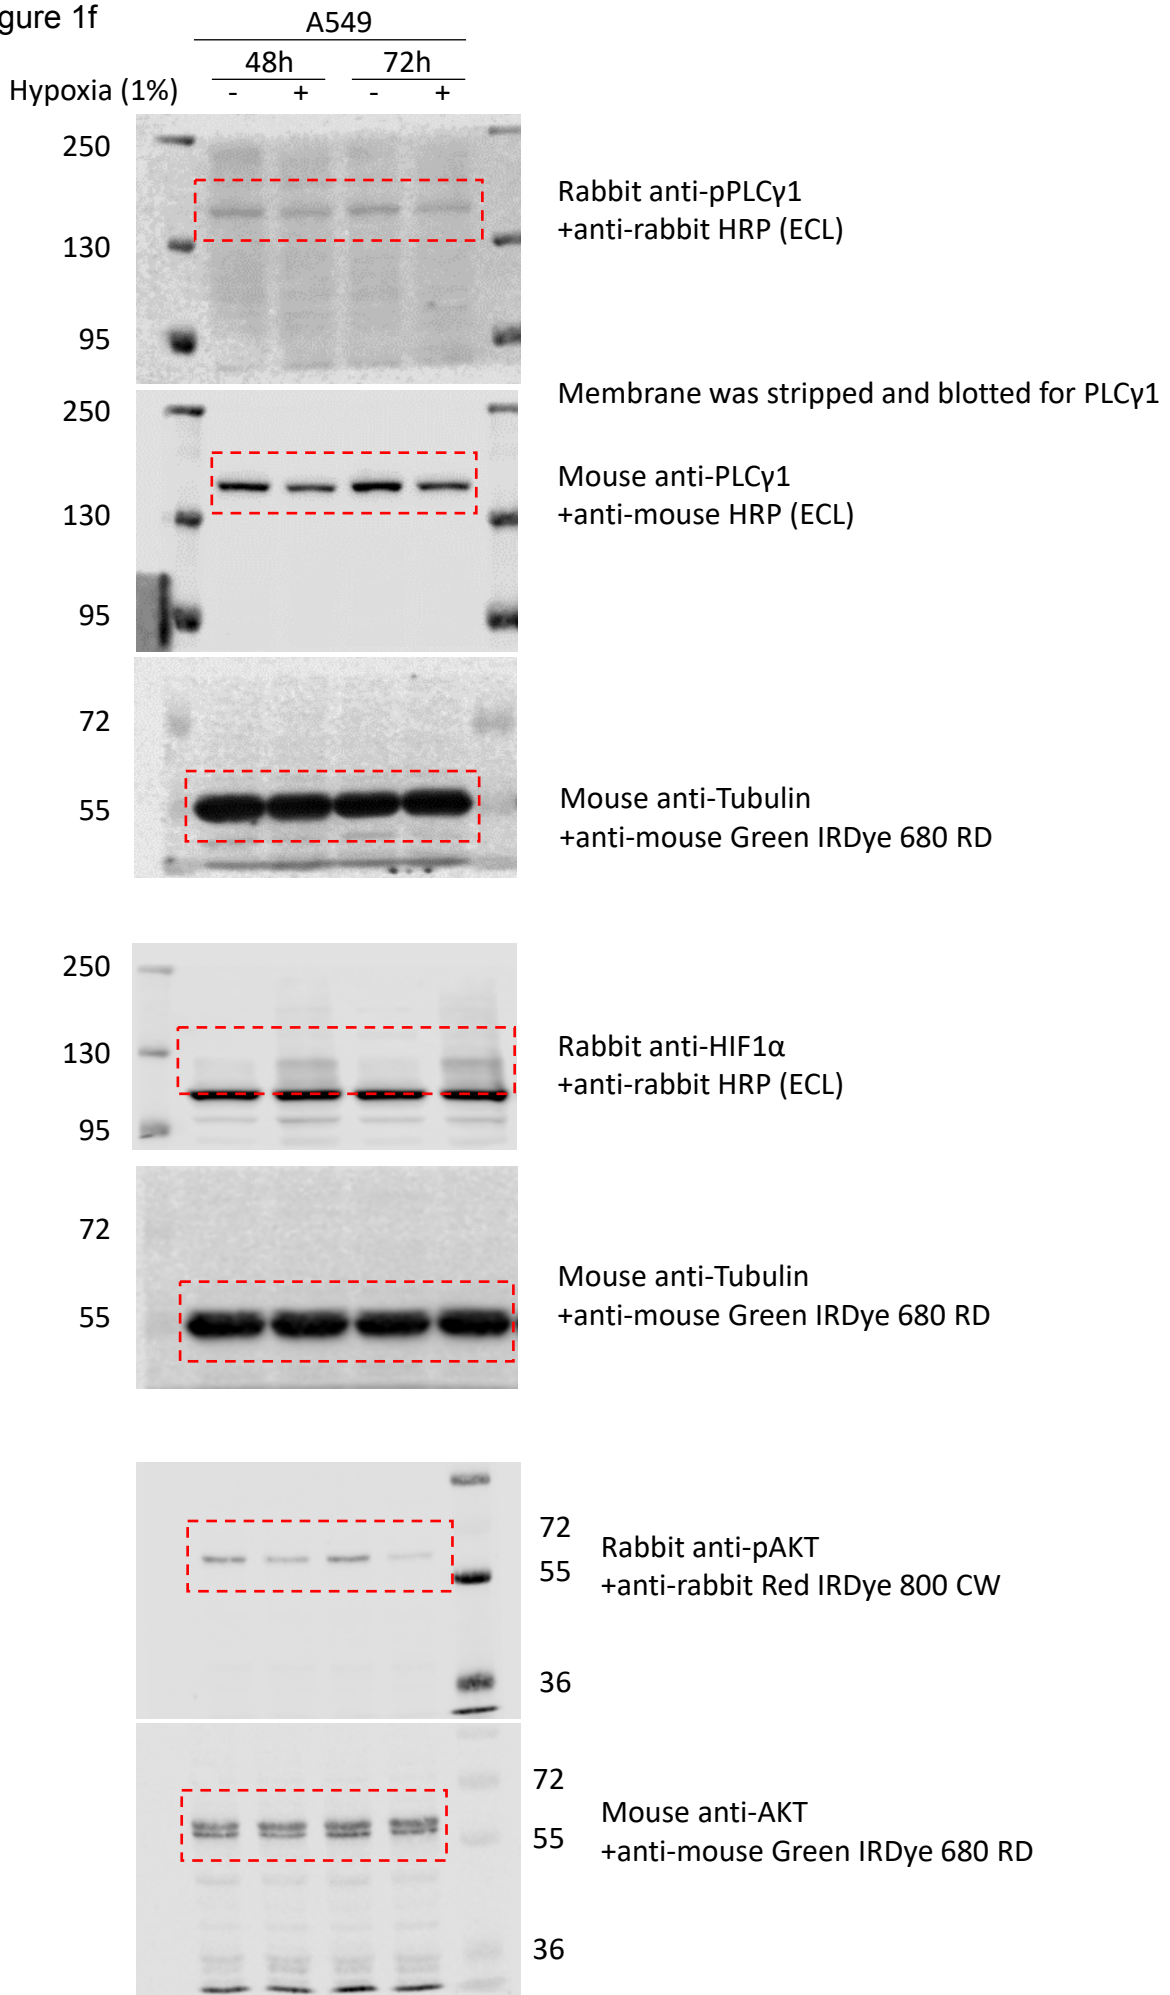



Figure 1f

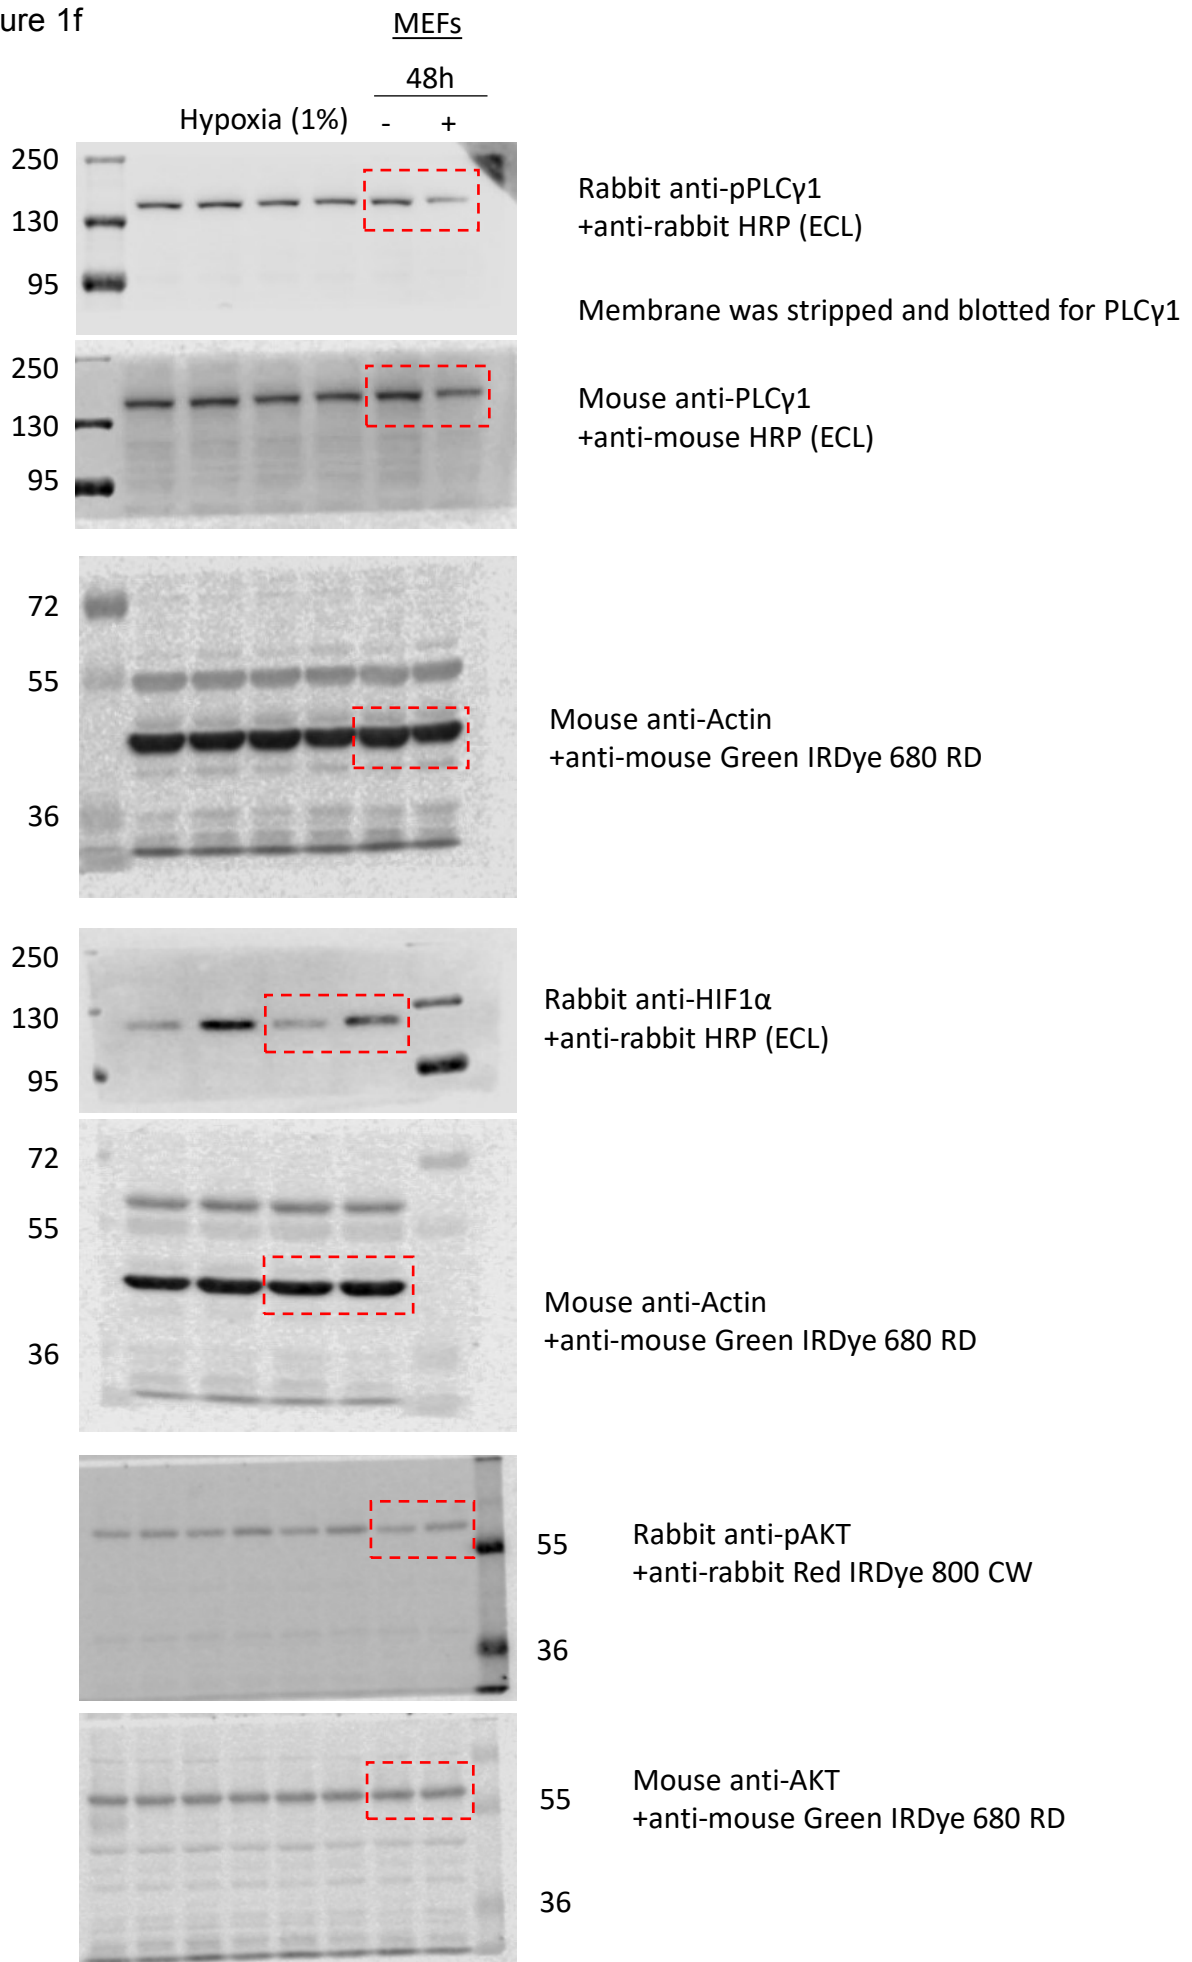

Figure 1h

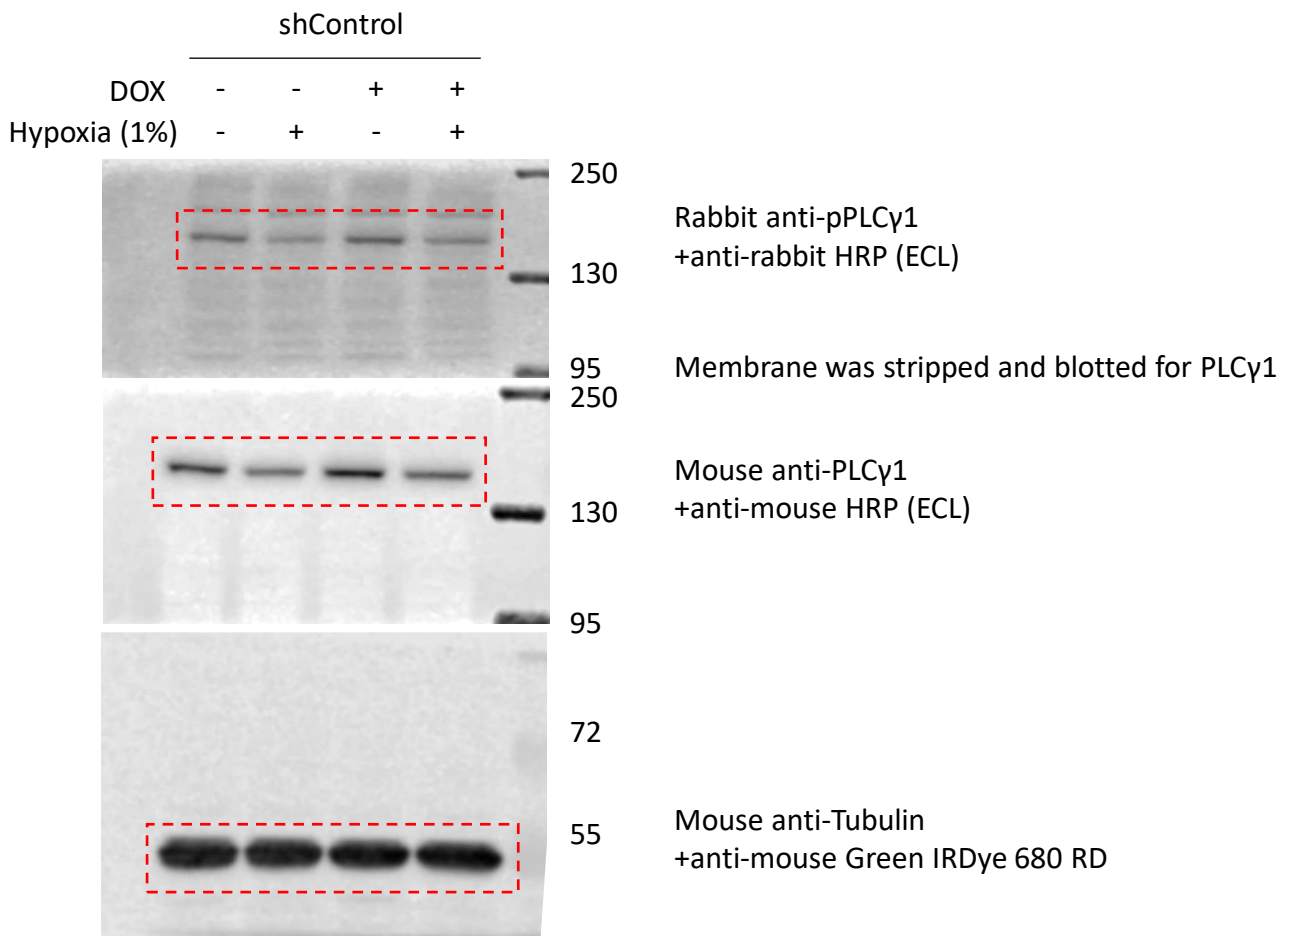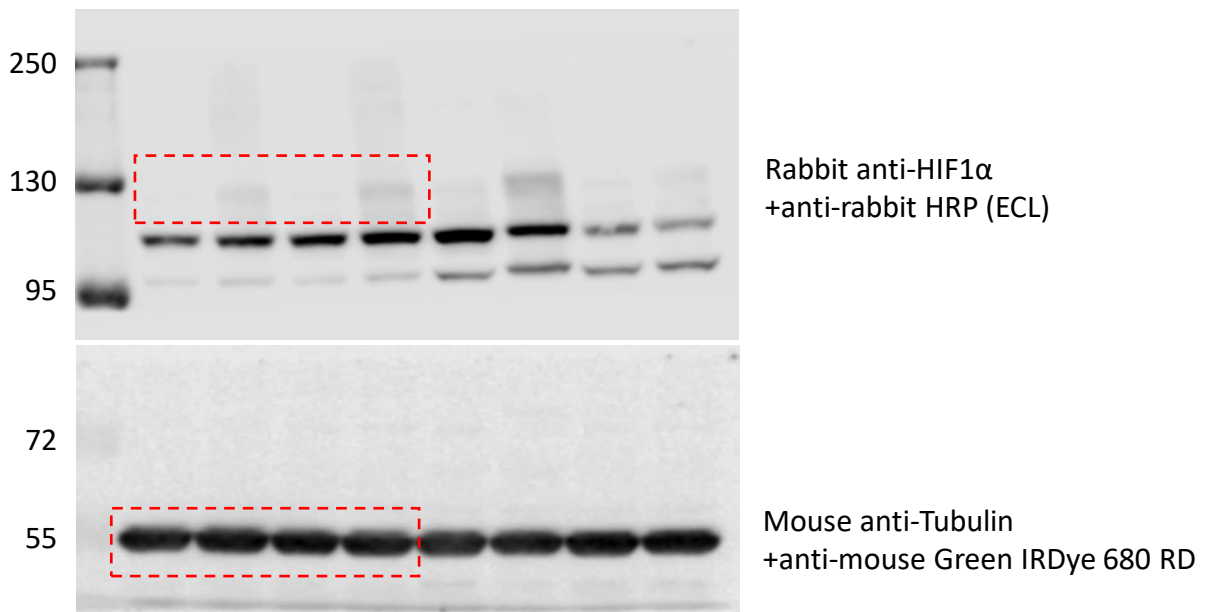

Figure 1h

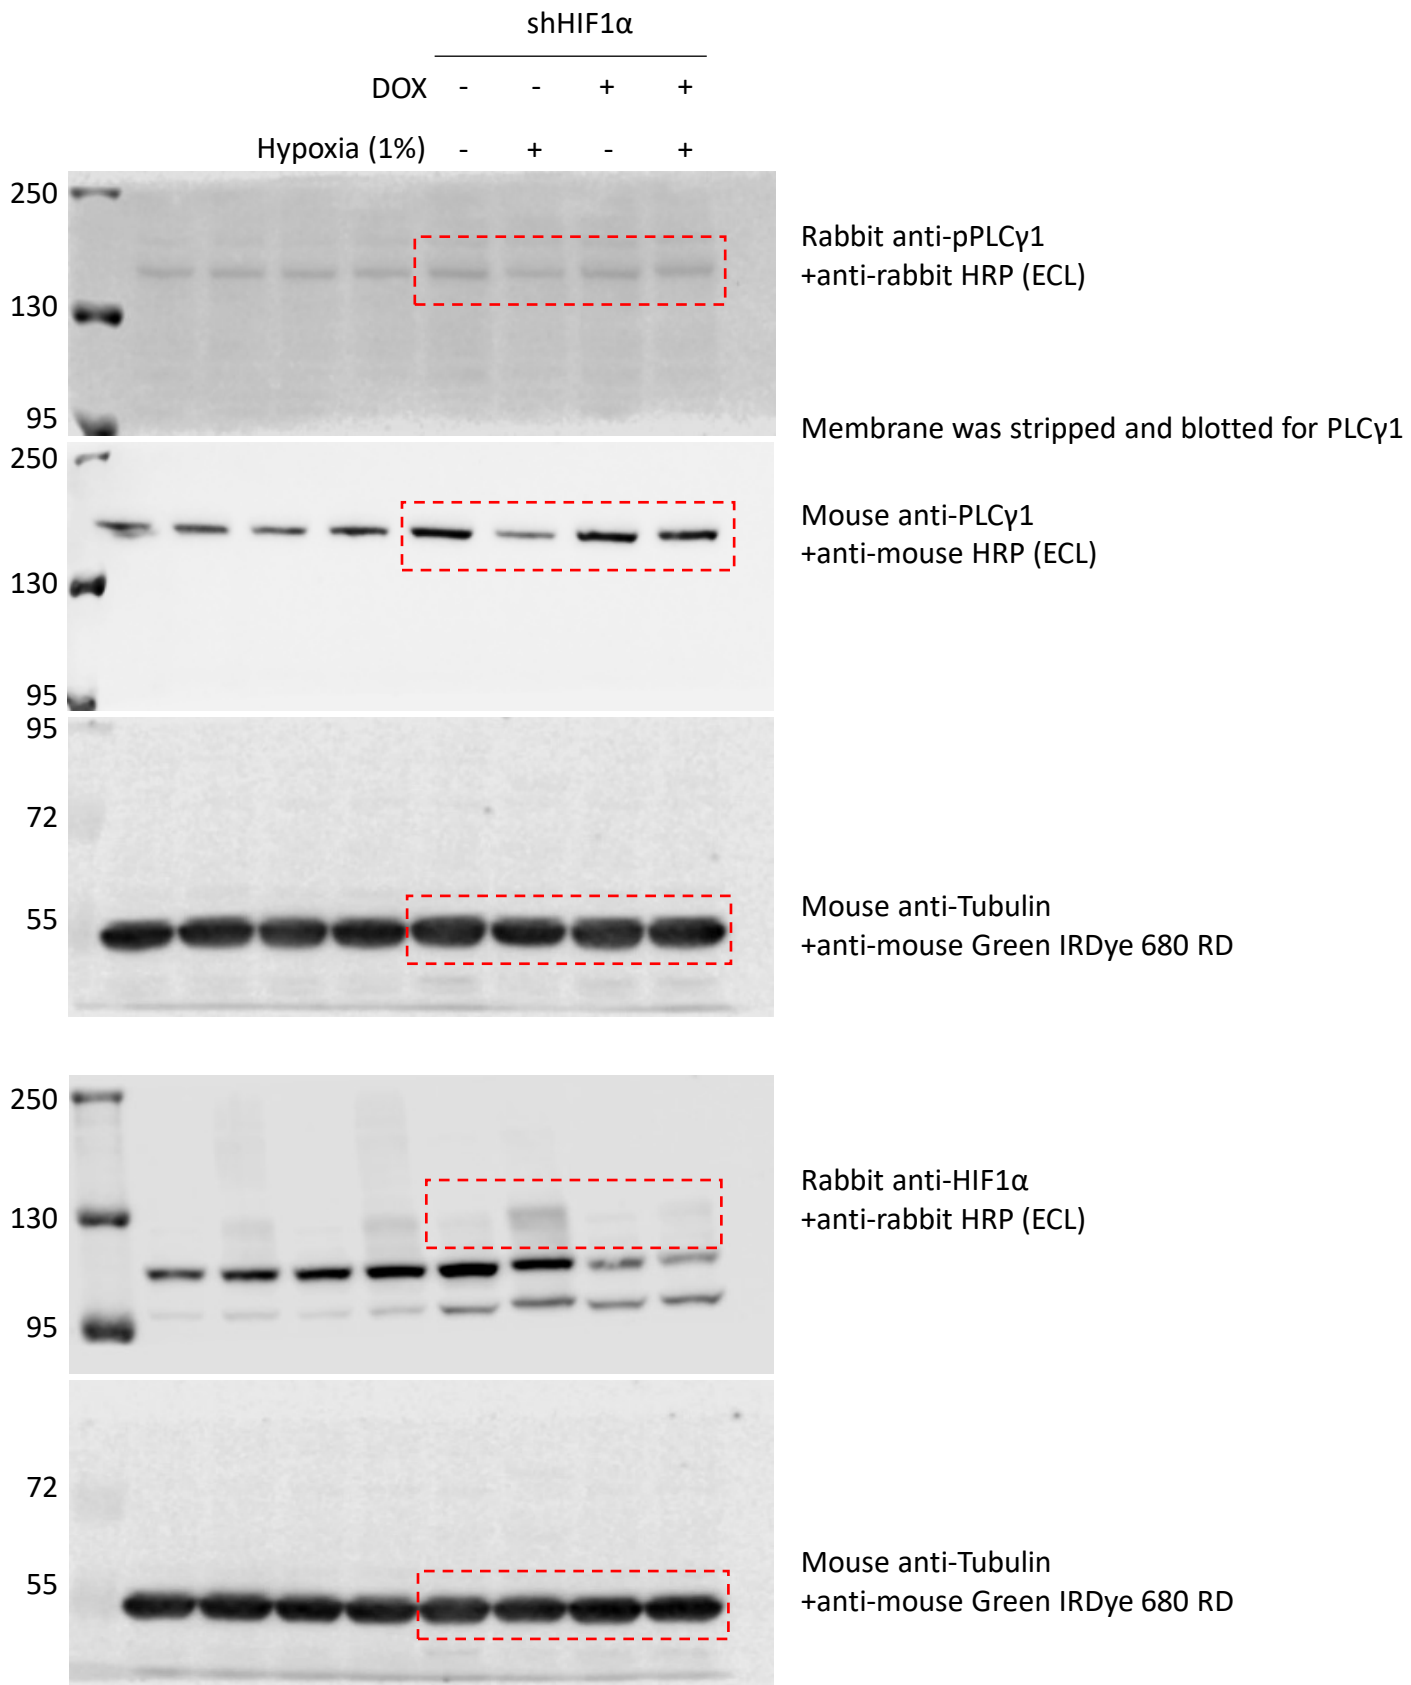

Supplement: EMS117941-supplement-Saliakoura__Unprocessed_Gels_Fig1.pdf [file EMS117941-supplement-Saliakoura__Unprocessed_Gels_Fig1.pdf]

Figure 2a

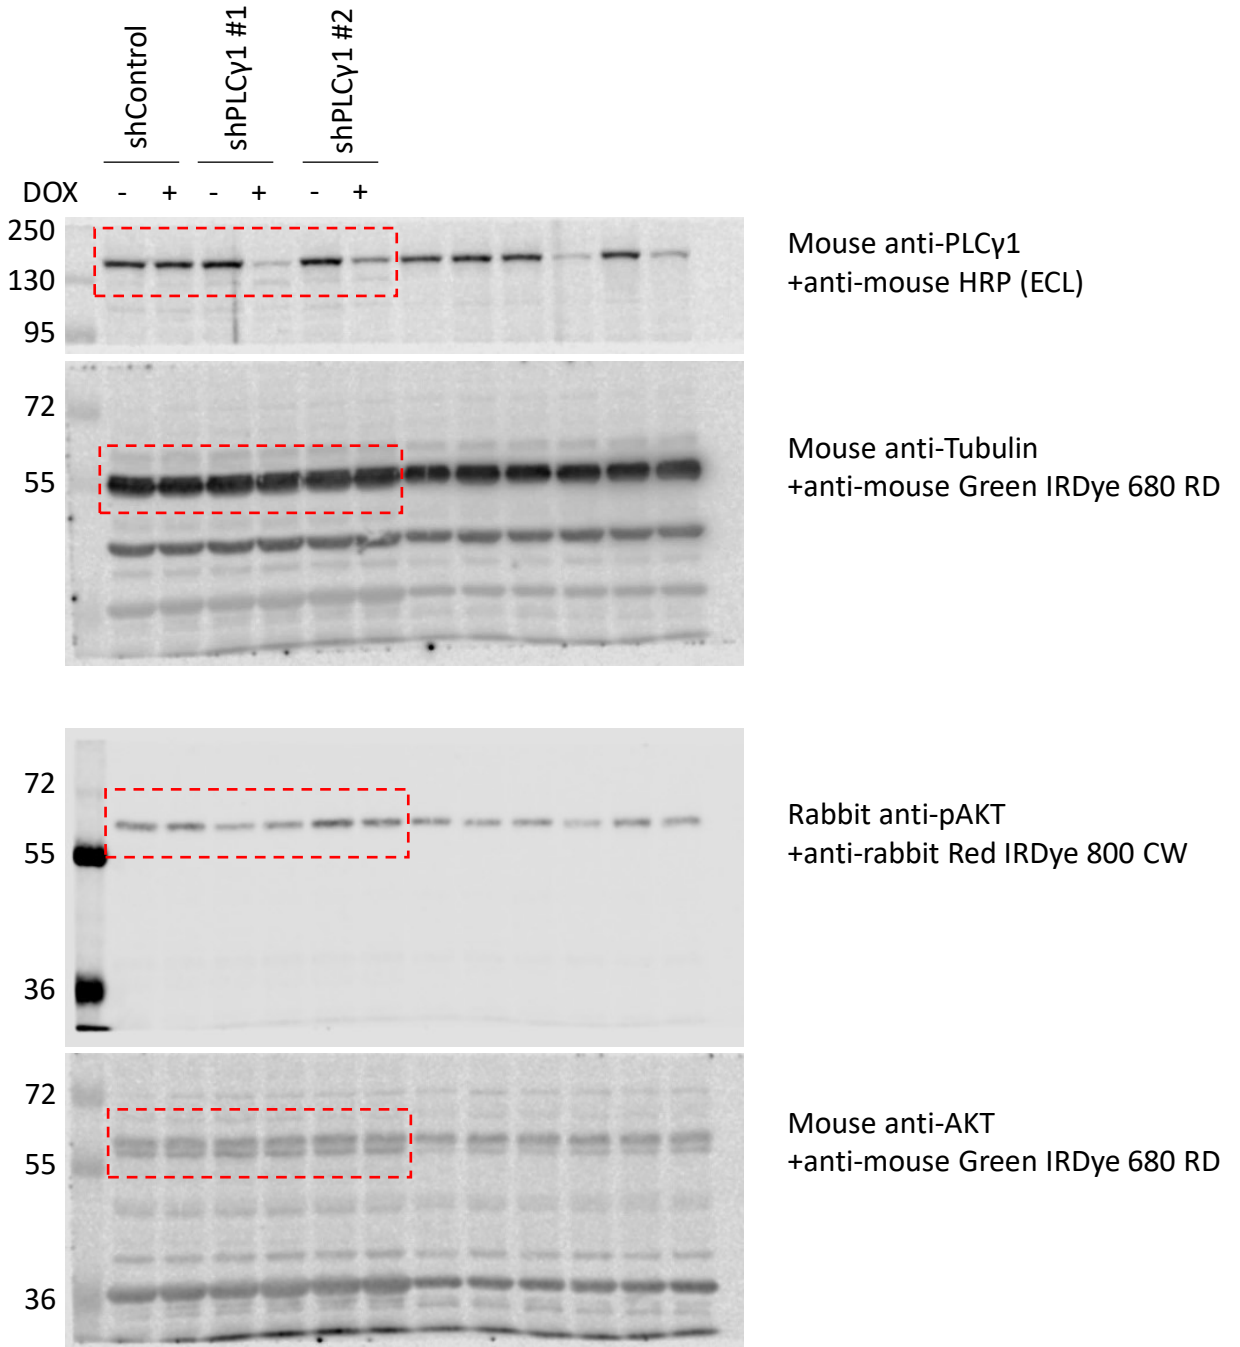

Figure 2e

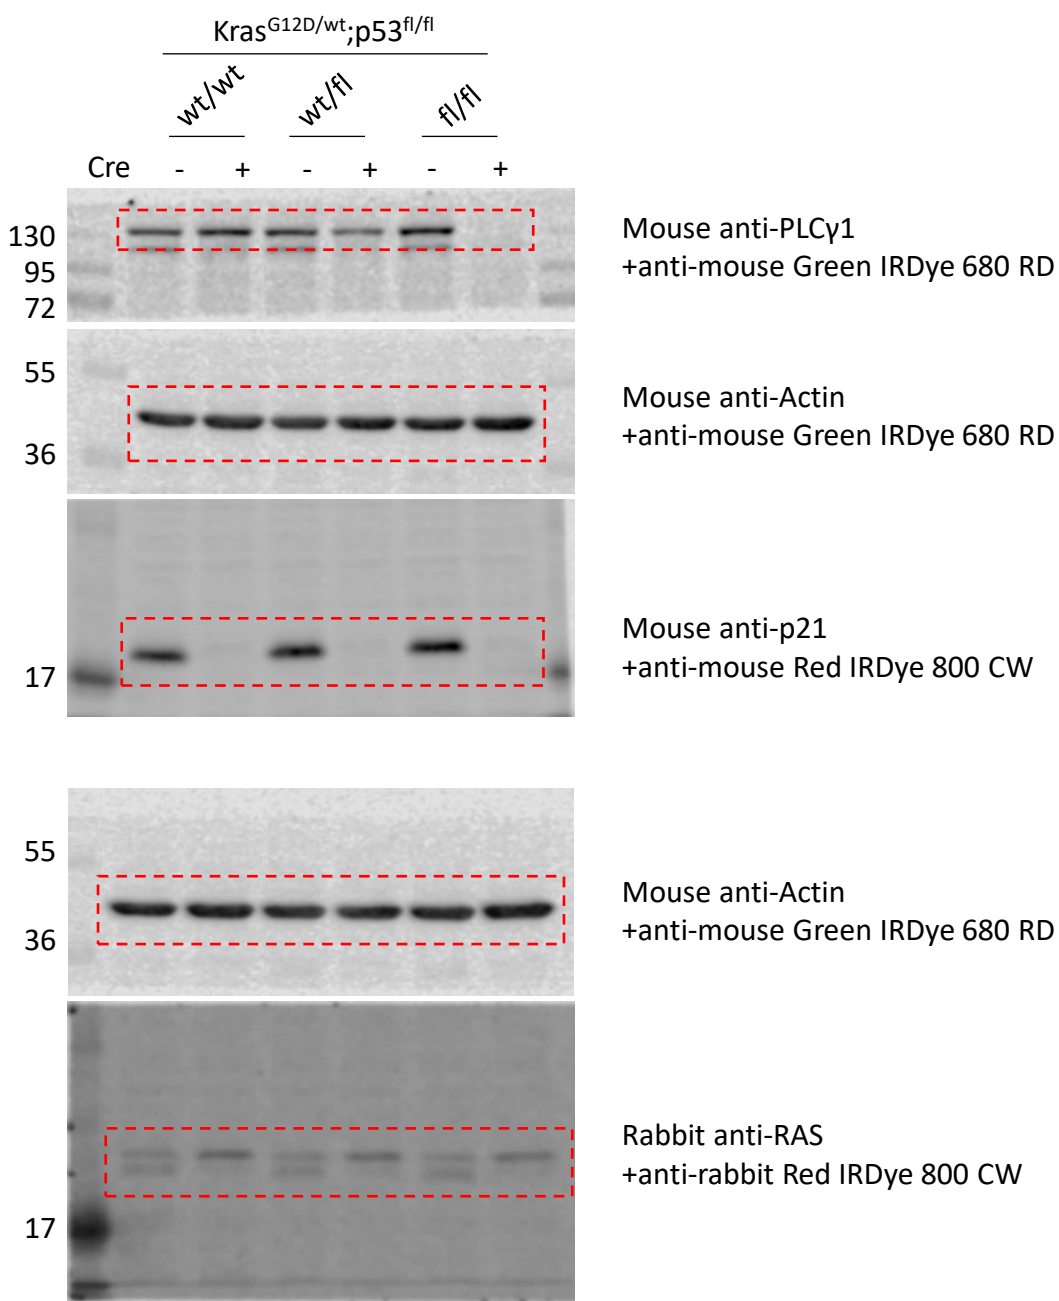

Supplement: EMS117941-supplement-Saliakoura__Unprocessed_Gels_Fig2.pdf [file EMS117941-supplement-Saliakoura__Unprocessed_Gels_Fig2.pdf]

Figure 7b

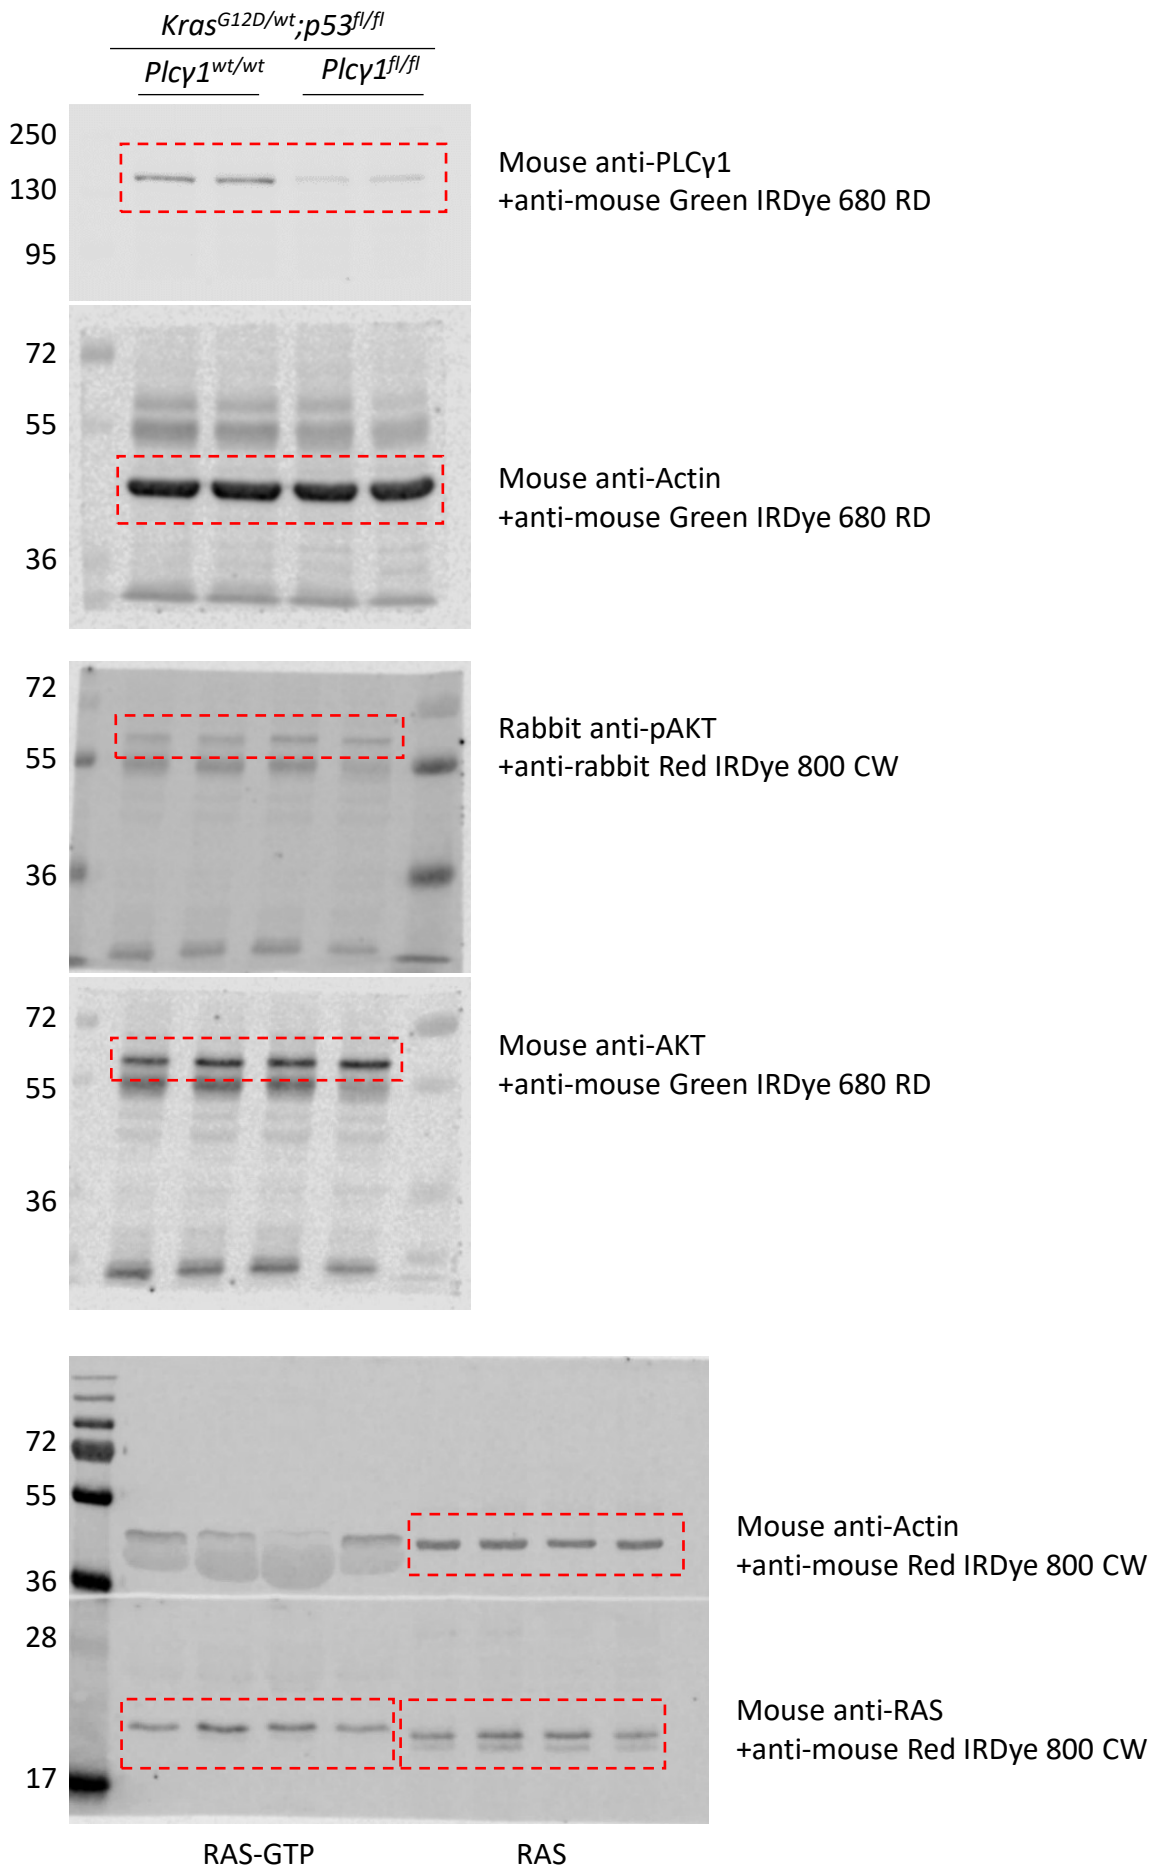

Figure 7j

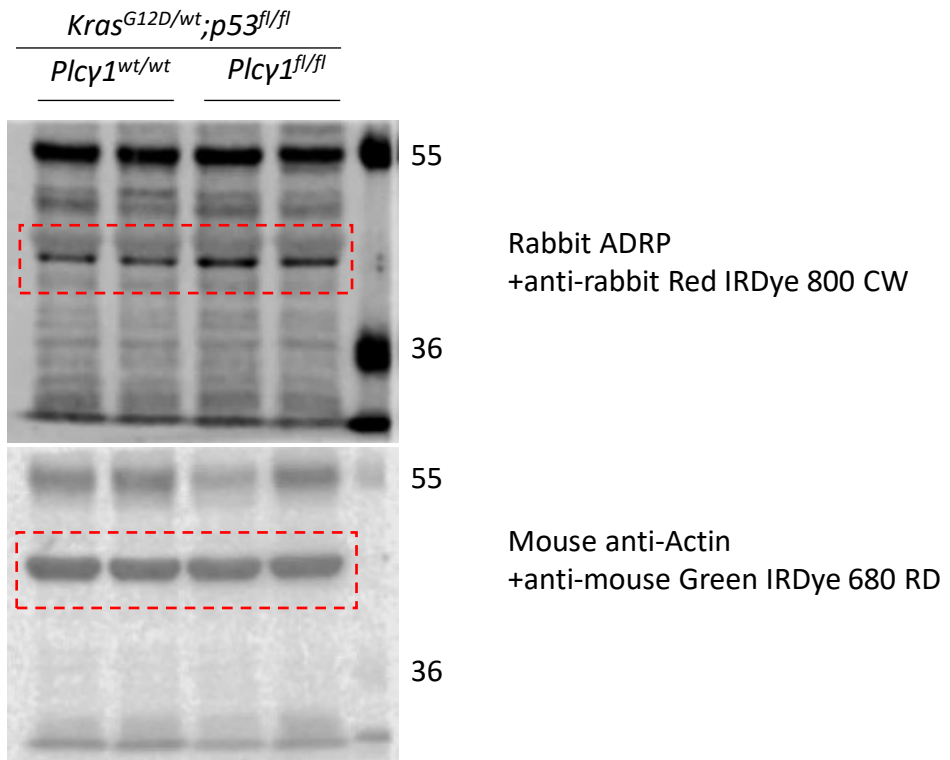

Supplement: EMS117941-supplement-Saliakoura__Unprocessed_Gels_Fig7.pdf [file EMS117941-supplement-Saliakoura__Unprocessed_Gels_Fig7.pdf]
